# Supplementary material for: Mesomorphism of a tetrahedral zinc complex
Source: Royal Society of Chemistry journal article supplement (doi:10.1039/b407652d), 2004-01-01

**# Supplementary Material (ESI) for Chemical Communications**

**# This journal is © The Royal Society of Chemistry 2004**

**Electronic supporting information file (ESI)**

**Towards mesomorphism in tetrahedral luminescent zinc complexes**

Raquel Giménez, Ana Belén Manrique, Santiago Uriel, Joaquín Barberá and José Luis Serrano.

**Characterization data of the novel complexes:**

**L2m**: Elemental analysis (%) calcd. for C71H104N4O4: C, 79.13; H, 9.73; N, 5.20. Found: C, 79.17; H, 9.68; N: 5.16. MS (FAB-LSIMS): 1078 [M+1+]+. 1H NMR (300 MHz, CDCl3)  = 0.89 (t, 12H), 1.29-1.49 (m, 56 H), 1.77-1.85 (m, 8H), 3.98 (t, *J* = 6.6 Hz, 4H), 4.02 (t, *J* = 6.6 Hz, 4H), 6.17 (s, 2H), 6.51 (s,2H), 6.91 (d, *J* = 8.8 Hz, 4H), 7.02 (d, *J* = 8.8 Hz, 4H), 7.73 (d, *J* = 8.8 Hz, 4H), 7.87 (d, *J* = 8.8 Hz, 4H).

**L2e:** Elemental analysis (%) calcd. for C72H106N4O4: C, 79.22; H, 9.79; N, 5.13. Found: C, 79.22; H, 9.75; N, 5.07. MS (FAB-LSIMS): 1092 [M]+. 1H NMR (300 MHz, CDCl3)  = 0.91 (t, 12H), 1.22-1.49 (m, 56 H), 1.67-1.81 (m, 8H), 3.69 (t, *J* = 6.6 Hz, 4H), 3.97 (t, *J* = 6.6 Hz, 4H), 4.56 (s, 4H), 6.31 (s,2H), 6.65 (d, *J* = 8.8 Hz, 4H), 6.86 (d, *J* = 8.8 Hz, 4H), 6.89 (d, *J* = 8.8 Hz, 4H), 7.59 (d, *J* = 8.8 Hz, 4H).

**[ZnL2Cl2]:** Elemental analysis (%) calcd. for C70H104Cl2N4O4Zn: C, 69.95; H, 8.72; N, 4.66. Found: C, 69.87; H, 8.70; N, 4.60. MS (LSIMS): 1164 [M-Cl]+. 1H NMR (300 MHz, DMSO-d6)  = 0.86 (t, 12H), 1.20-1.42 (m, 56 H), 1.68-1.76 (m, 8H), 3.98 (t, *J* = 6.3 Hz, 4H), 4.00 (t, *J* = 6.3 Hz, 4H), 6.95 (s, 2H), 6.96 (d, *J* = 8.6 Hz, 4H), 7.01 (d, *J* = 8.6 Hz, 4H), 7.69 (d, *J* = 8.6 Hz, 4H), 7.75 (d, *J* = 8.6 Hz, 4H).

**[Zn(L2m)Cl2]:** Elemental analysis (%) calcd. for C71H104Cl2N4O4Zn: C, 70.25; H, 8.64; N, 4.62. Found: C, 70.24; H, 8.65; N, 4.58. MS (LSIMS): 1175 [M-Cl]+. 1H NMR (300 MHz, CDCl3)  = 0.85-0.90 (m, 12H), 1.25-1.49 (m, 56 H), 1.70-1.85 (m, 8H), 3.93 (t, *J* = 6.2 Hz, 4H), 3.94 (t, *J* = 6.2 Hz, 4H), 6.45 (s, 4H), 6.74 (d, *J* = 8.8 Hz, 4H), 6.94 (d, *J* = 8.8 Hz, 4H), 7.01 (d, *J* = 8.8 Hz, 4H), 7.73 (d, *J* = 8.8 Hz, 4H).

**[Zn(L2e)Cl2]:** Elemental analysis (%) calcd. for C72H106Cl2N4O4Zn: C, 70.42; H, 8.70; N, 4.56. Found: C, 70.45; H, 8.76; N, 4.58. MS (Electrospray): 1250 [M+Na]+. 1H NMR (300 MHz, CDCl3)  = 0.86-0.90 (m, 12H), 1.28-1.44 (m, 56 H), 1.75-1.85 (m, 8H), 3.86 (t, *J* = 6.3 Hz, 4H), 3.96 (t, *J* = 6.3 Hz, 4H), 4.69 (s, 4H), 6.35 (s, 2H), 6.84 (d, *J* = 8.6 Hz, 4H), 6.91 (d, *J* = 8.6 Hz, 4H), 7.07 (d, *J* = 8.6 Hz, 4H), 7.67 (d, *J* = 8.6 Hz, 4H).

Microphotograph under polarised light of the texture displayed by compound **[Zn(L2e)Cl2]** at 152ºC (SmA).


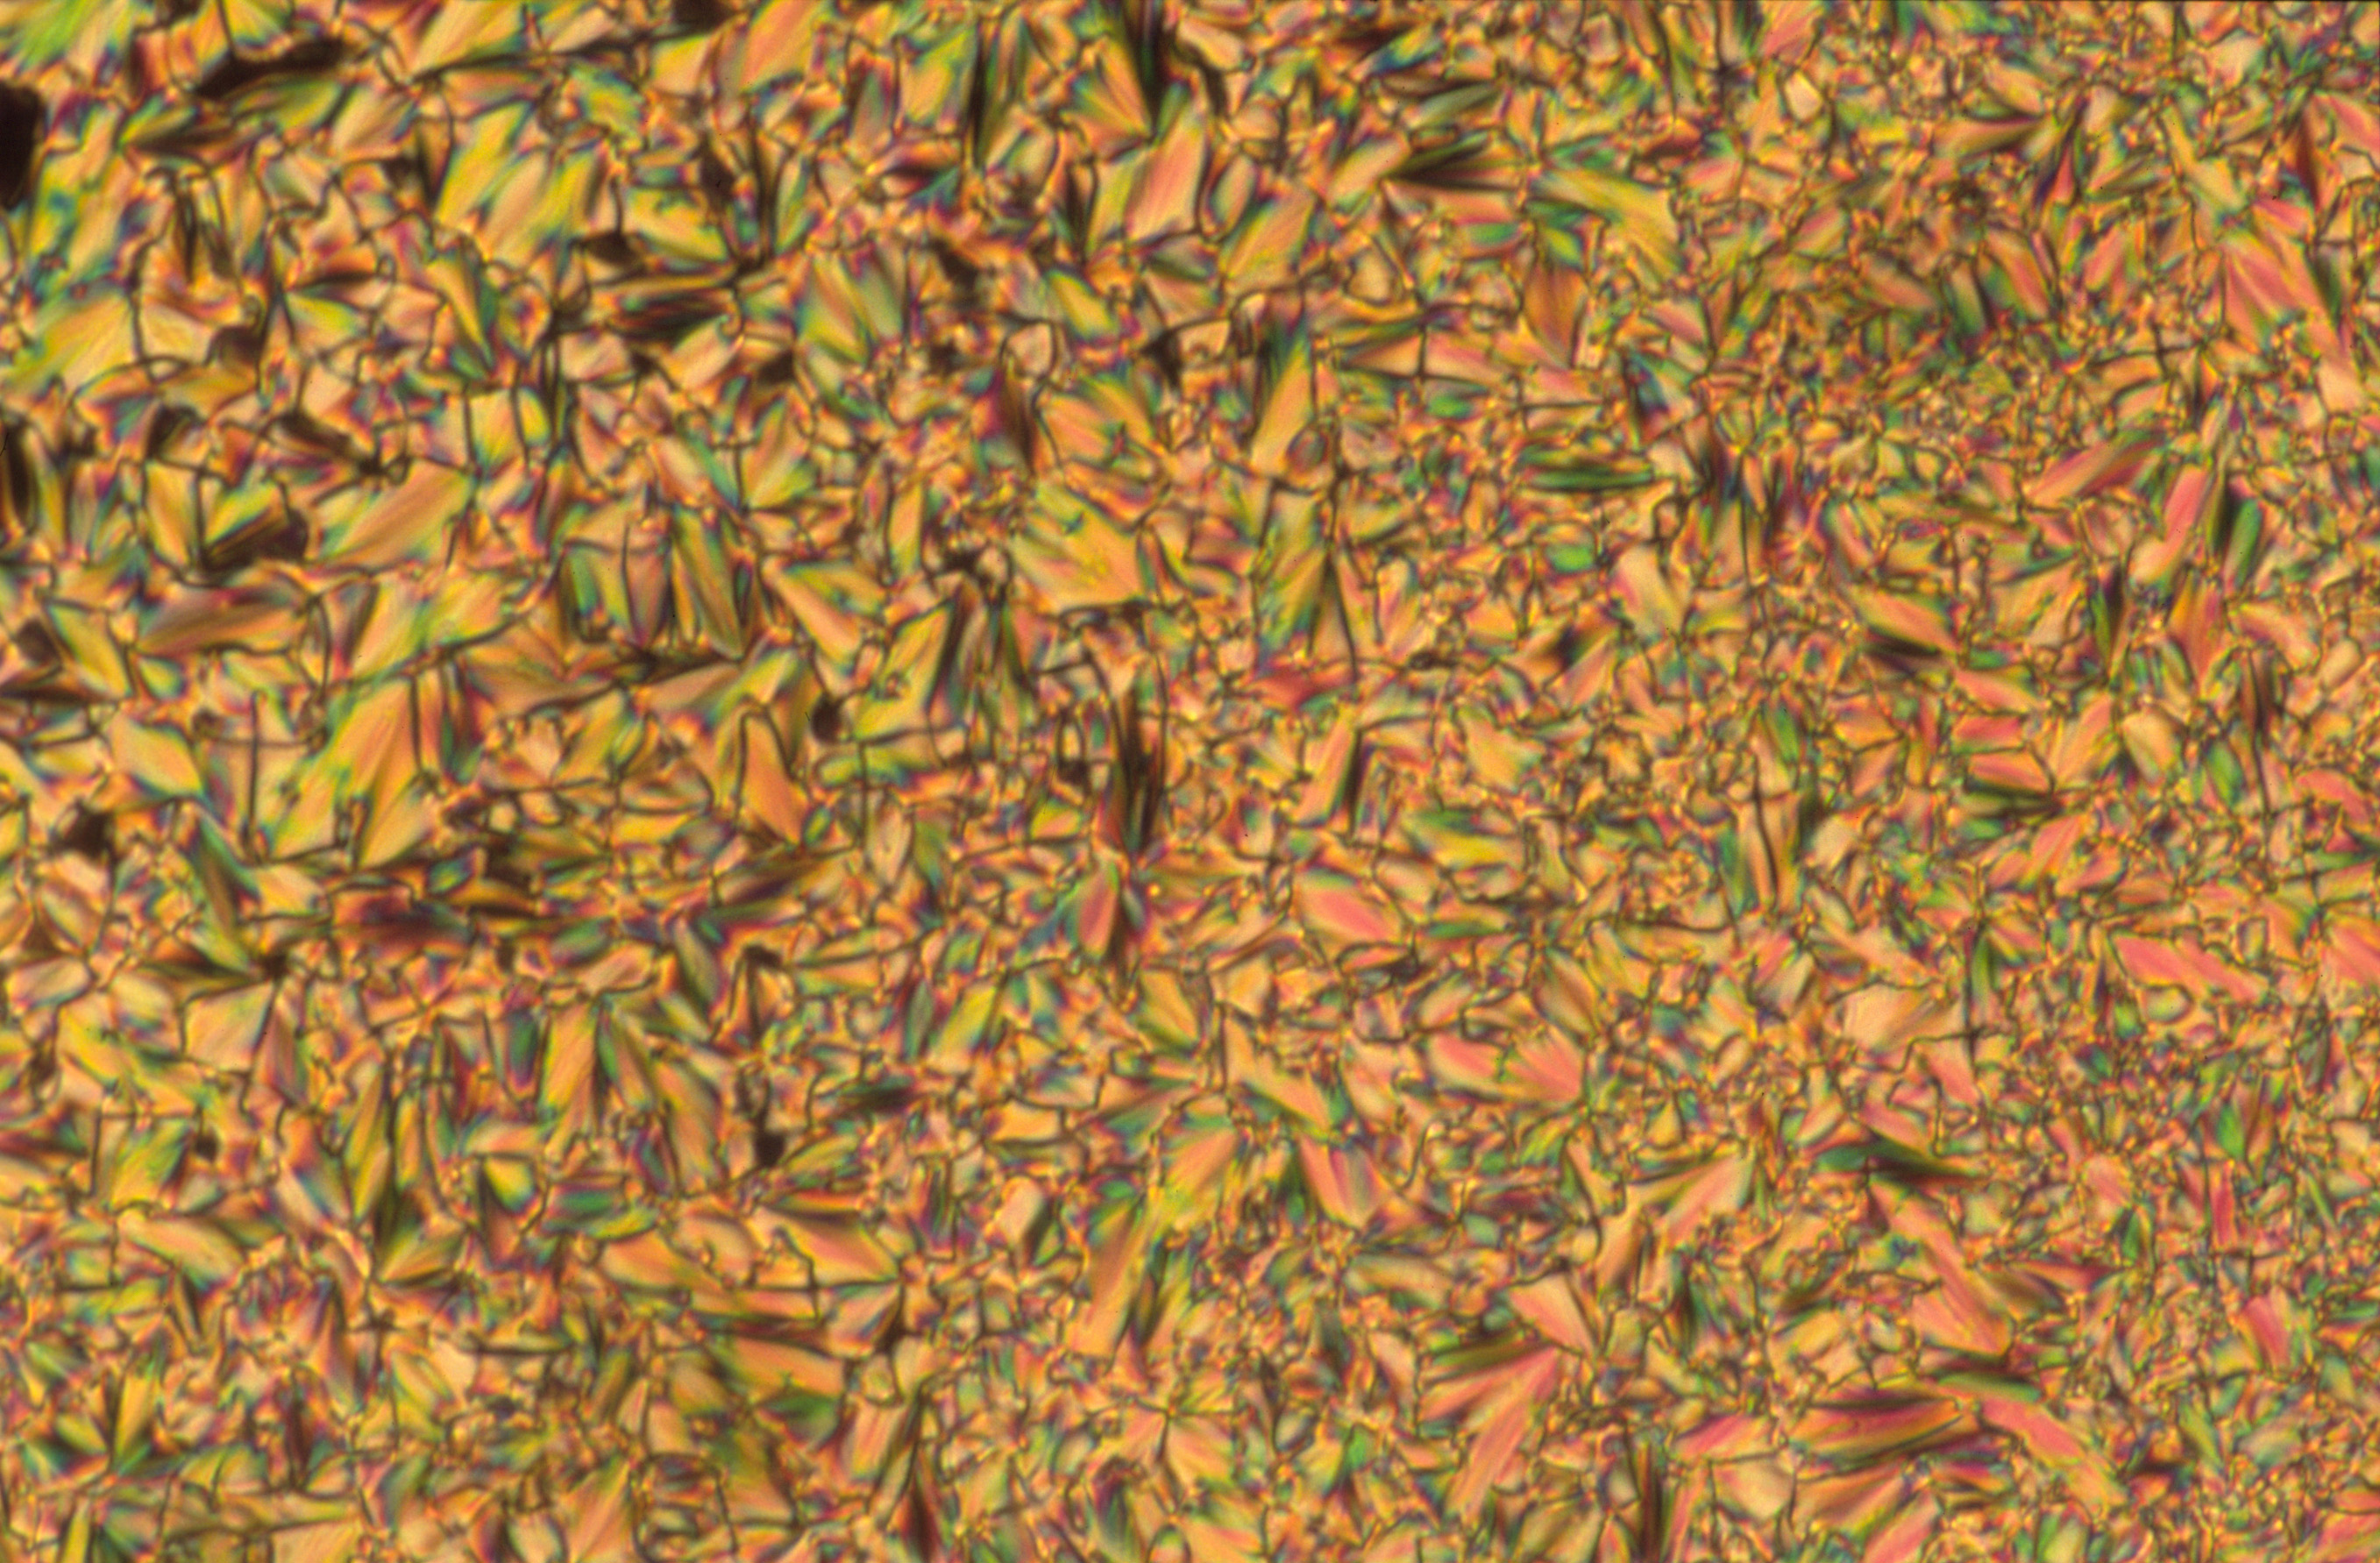


Microphotograph under polarised light of the texture displayed by compound **[Zn(L2e)Cl2]** at 132ºC (SmC).


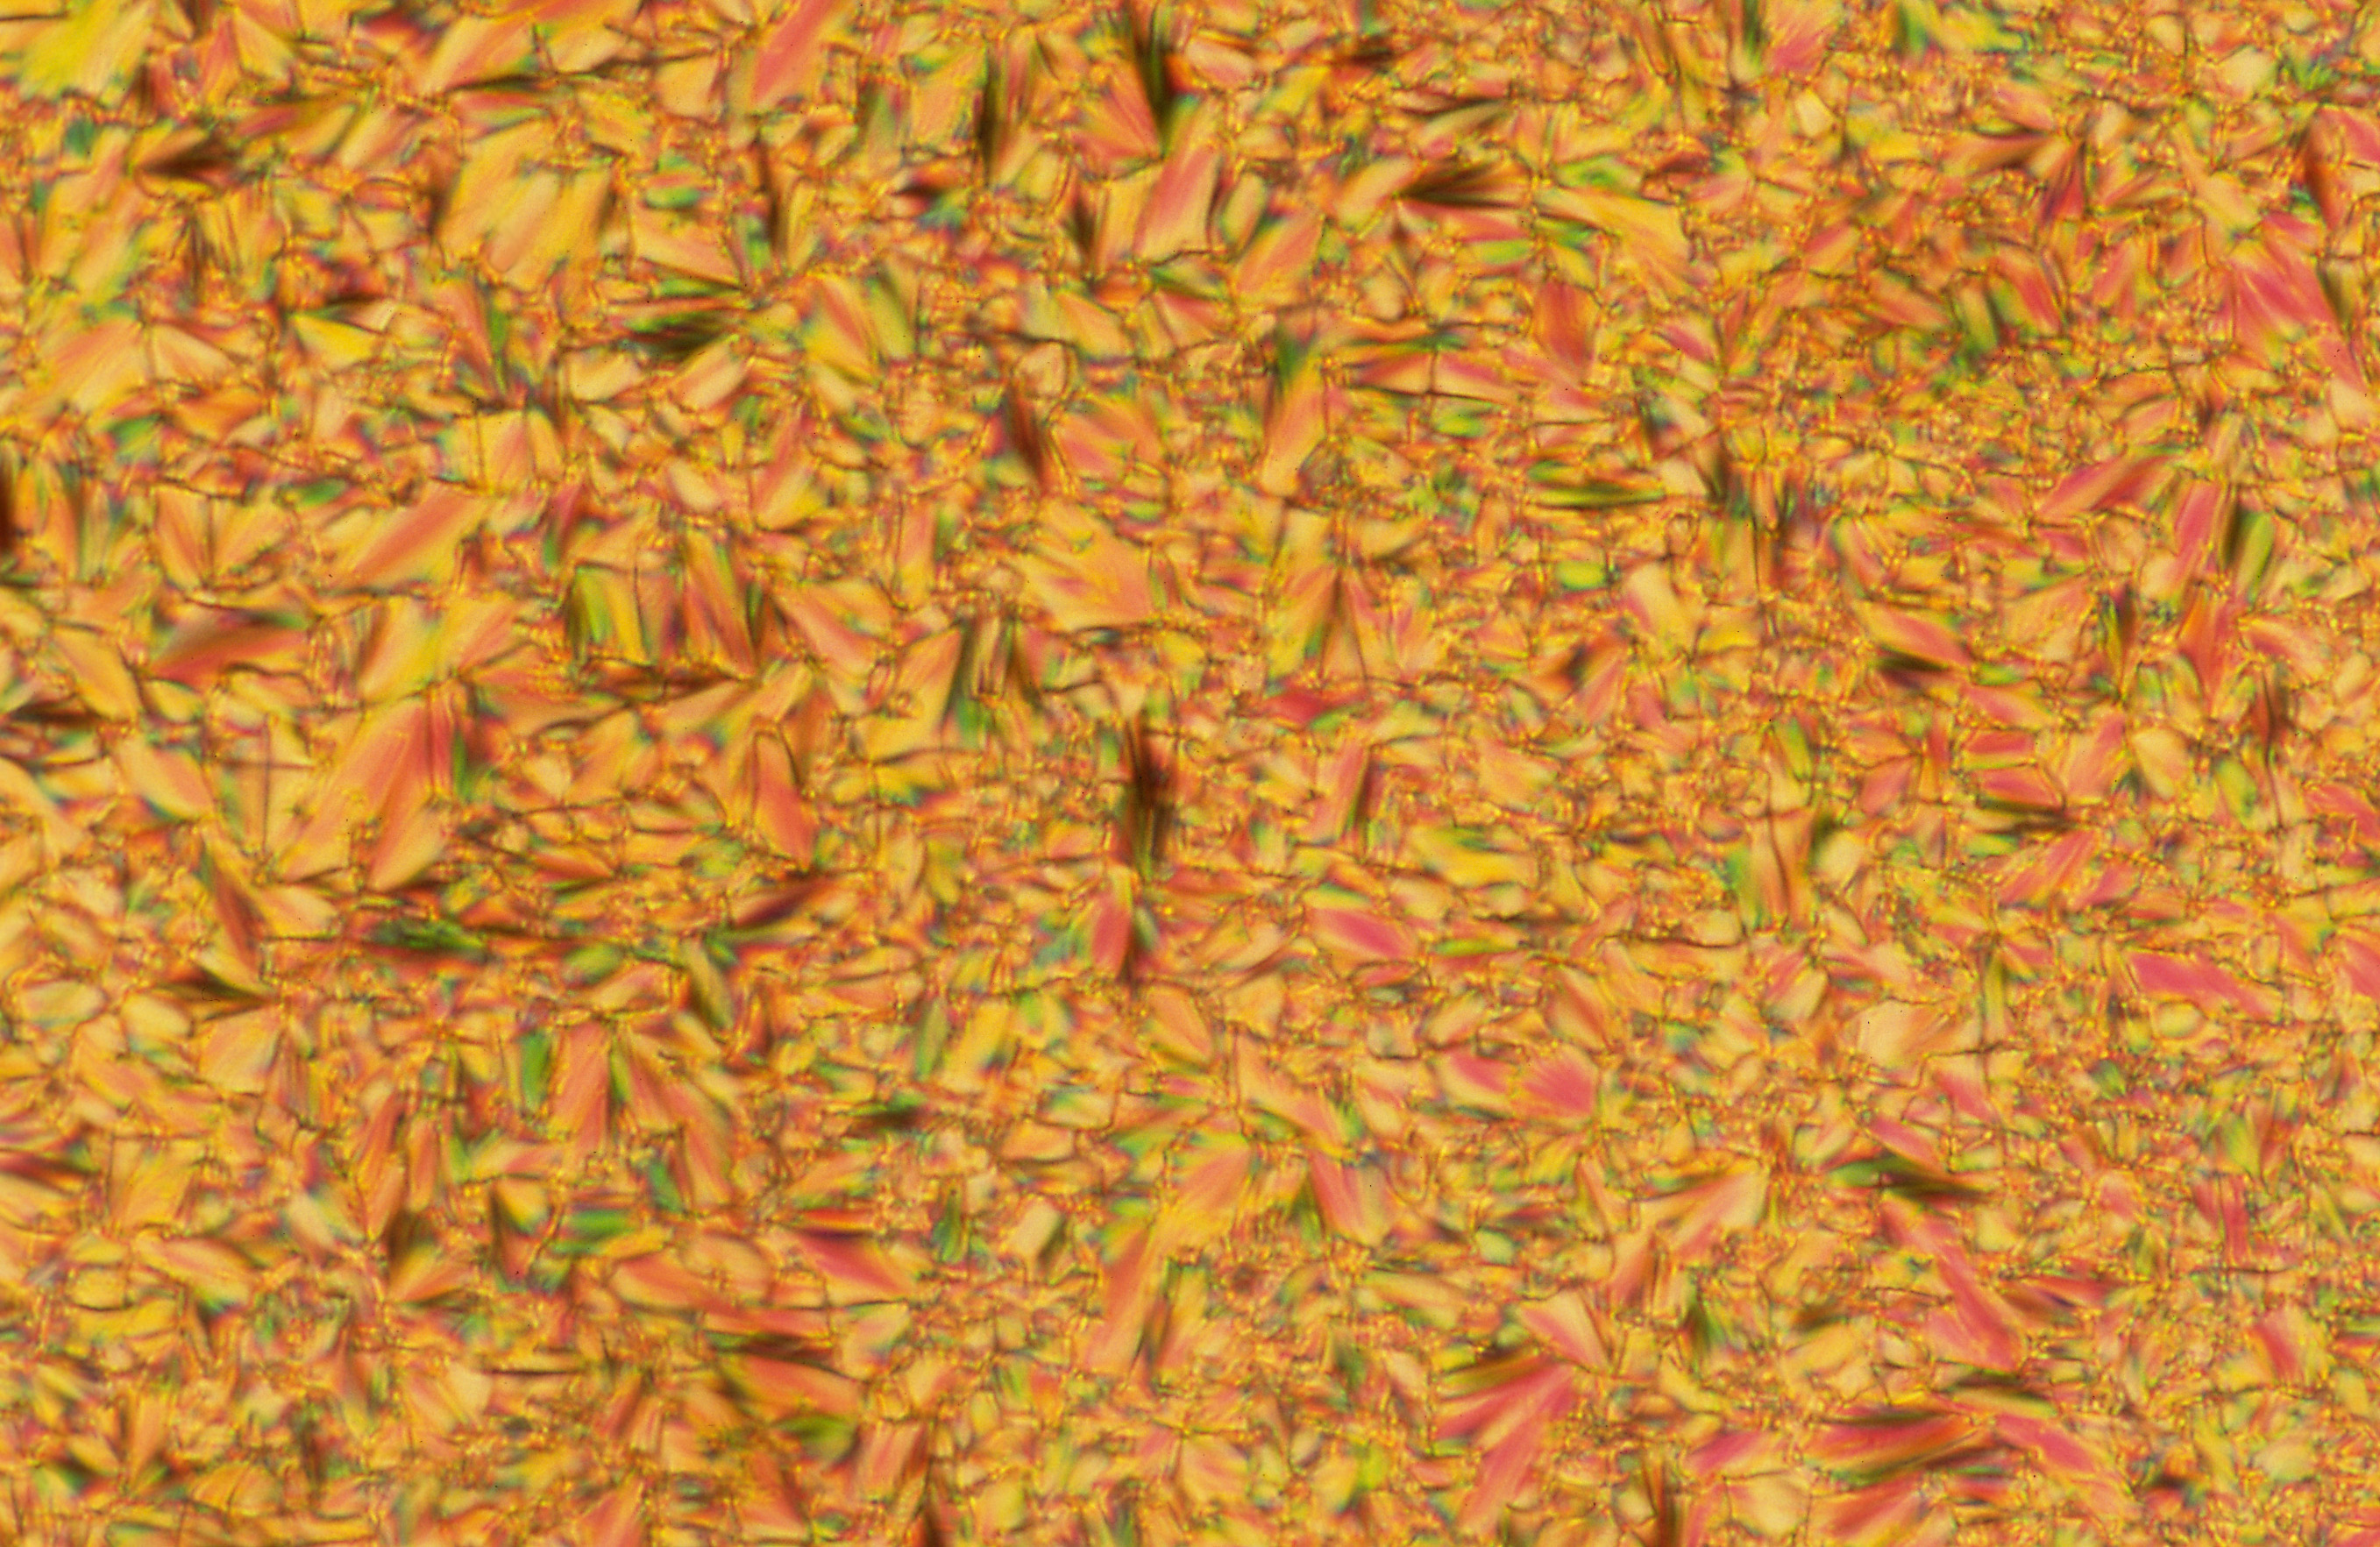

Supplement: b407652d.doc [file b407652d.doc]
